# Supplementary material for: A culturally tailored research ethics training curriculum for American Indian and Alaska Native communities: a randomized comparison trial
Source: PubMed Central journal article supplement — Crit Public Health. Author manuscript; Available in PMC 2019 Jan 4. (PMC6320230; doi:10.1080/09581596.2018.1434482), 2018-02-20
Supplement: NIHMS953414-supplement-Table1.pdf [file NIHMS953414-supplement-Table1.pdf]

**Table 1, web appendix. Comparison of geographical and socio-demographics by study arm among N=467 AIAN community members**

|                                                      | <b>N</b> | <b>Combined</b><br>N (%) | <b>AIAN</b><br><b>Curriculum</b><br><b>(n=237)</b><br>N (%) | <b>CITI</b><br><b>Curriculum</b><br><b>(n=230)</b><br>N (%) | <b>Test</b><br><b>Statistic</b> |
|------------------------------------------------------|----------|--------------------------|-------------------------------------------------------------|-------------------------------------------------------------|---------------------------------|
| Age ( M, SD)                                         | 455      | 39.5 (13.82)             | 38.9 (13.78)                                                | 40.0 (13.86)                                                | t=-0.8                          |
| Years of research experience (M, SD)                 | 438      | 1.2 (2.8)                | 1.2 (2.7)                                                   | 1.1 (2.9)                                                   | t=0.33                          |
| Gender                                               | 464      |                          |                                                             |                                                             | $\chi^2(1)=0.67$                |
| Male                                                 |          | 126 (27.16)              | 68 (28.81)                                                  | 58 (25.44)                                                  |                                 |
| Female                                               |          | 338 (72.84)              | 168 (71.19)                                                 | 170 (74.56)                                                 |                                 |
| Post high school degree                              | 458      | 235 (51.09)              | 125 (52.97)                                                 | 110 (49.55)                                                 | $\chi^2(1)=0.53$                |
| Tribal recognition status                            | 464      |                          |                                                             |                                                             | $\chi^2(2)=0.74$                |
| Federal                                              |          | 420 (90.52)              | 212 (89.83)                                                 | 208 (91.20)                                                 |                                 |
| State                                                |          | 39 (8.41)                | 22 (9.32)                                                   | 17 (7.46)                                                   |                                 |
| Neither                                              |          | 5 (1.08)                 | 2 (0.85)                                                    | 3 (1.32)                                                    |                                 |
| Tribal enrollment status                             | 458      |                          |                                                             |                                                             | $\chi^2(2)=0.85$                |
| Enrolled member                                      |          | 406 (88.65)              | 207 (87.71)                                                 | 199 (89.64)                                                 |                                 |
| Eligible for enrollment                              |          | 20 (4.37)                | 10 (4.24)                                                   | 10 (4.50)                                                   |                                 |
| Descendant of a tribe member                         |          | 32 (6.99)                | 19 (8.05)                                                   | 13 (5.86)                                                   |                                 |
| Currently going to school or training program        | 447      |                          |                                                             |                                                             | $\chi^2(1)=1.97$                |
| Yes                                                  |          | 133 (29.75)              | 77 (32.63)                                                  | 56 (26.54)                                                  |                                 |
| No                                                   |          | 314 (70.25)              | 159 (67.37)                                                 | 155 (73.46)                                                 |                                 |
| Employment status                                    | 442      |                          |                                                             |                                                             | $\chi^2(3)=1.61$                |
| Temporary                                            |          | 20 (4.52)                | 8 (3.39)                                                    | 12 (5.83)                                                   |                                 |
| Part-time                                            |          | 72 (16.29)               | 39 (16.53)                                                  | 33 (16.02)                                                  |                                 |
| Full-time                                            |          | 236 (53.39)              | 126 (53.39)                                                 | 110 (53.40)                                                 |                                 |
| Unemployed                                           |          | 114 (25.79)              | 63 (26.69)                                                  | 51 (24.76)                                                  |                                 |
| Community setting                                    | 464      |                          |                                                             |                                                             | $\chi^2(1)=0.01$                |
| Rural                                                |          | 176 (37.93)              | 89 (37.71)                                                  | 87 (38.16)                                                  |                                 |
| Urban                                                |          | 288 (62.07)              | 147 (62.29)                                                 | 141 (61.84)                                                 |                                 |
| Geographical area                                    | 464      |                          |                                                             |                                                             | $\chi^2(9)= 0.96$               |
| Northern Plains                                      |          | 74 (16.00)               | 36 (15.25)                                                  | 38 (16.70)                                                  |                                 |
| Southwestern                                         |          | 66 (14.22)               | 33 (14.00)                                                  | 33 (14.50)                                                  |                                 |
| Great Basin                                          |          | 60 (12.93)               | 32 (13.60)                                                  | 28 (12.30)                                                  |                                 |
| Northeastern                                         |          | 51 (11.00)               | 28 (11.90)                                                  | 23 (10)                                                     |                                 |
| Northwest Coast,                                     |          | 53 (11.42)               | 27 (11.44)                                                  | 26 (11.40)                                                  |                                 |
| Oklahoma                                             |          | 50 (10.80)               | 25 (10.60)                                                  | 25 (11.00)                                                  |                                 |
| Southeastern                                         |          | 36 (7.80)                | 18 (7.60)                                                   | 18 (7.90)                                                   |                                 |
| NW Plateau                                           |          | 35 (7.54)                | 17 (7.20)                                                   | 18 (7.90)                                                   |                                 |
| Alaska Natives,                                      |          | 22 (4.74)                | 12 (5.10)                                                   | 10 (4.40)                                                   |                                 |
| Rocky Mountains                                      |          | 17 (3.70)                | 8 (3.40)                                                    | 9 (3.95)                                                    |                                 |
| Past research experience (participated or conducted) | 448      |                          |                                                             |                                                             | $\chi^2(1)=0.12$                |
| Yes                                                  |          | 276 (61.61)              | 143 (60.85)                                                 | 133 (62.44)                                                 |                                 |
| No                                                   |          | 172 (38.39)              | 92 (39.15)                                                  | 80 (37.56)                                                  |                                 |
| Ever had research training                           | 449      |                          |                                                             |                                                             | $\chi^2(1)=0.48$                |
| Yes                                                  |          | 125 (27.84)              | 69 (29.24)                                                  | 56 (26.29)                                                  |                                 |
| No                                                   |          | 324 (72.16)              | 167 (70.76)                                                 | 157 (73.71)                                                 |                                 |

| Research interest <sup>6</sup> | 450         |             | 213         |                    |
|--------------------------------|-------------|-------------|-------------|--------------------|
| Cancer                         | 79 (17.56)  | 40 (16.95)  | 39 (18.31)  | $\chi^2(1)=0.14$   |
| Environmental Health           | 168 (37.42) | 94 (39.83)  | 74 (34.74)  | $\chi^2(1)=1.24$   |
| Gerontology                    | 26 (5.79)   | 13 (5.51)   | 13 (6.10)   | $\chi^2(1)=0.07$   |
| HIV/AIDS                       | 20 (4.45)   | 14 (5.93)   | 6 (2.82)    | $\chi^2(1)=2.55$   |
| Substance use                  | 186 (41.43) | 103 (43.64) | 83 (38.97)  | $\chi^2(1)=1.01$   |
| Mental Health                  | 285 (63.47) | 155 (65.68) | 130 (61.03) | $\chi^2(1)=1.042$  |
| Sexual/reproductive Health     | 61 (13.59)  | 32 (13.56)  | 29 (13.62)  | $\chi^2(1)=0.0003$ |
| Violence                       | 223 (49.67) | 118 (50.00) | 105 (49.30) | $\chi^2(1)=0.022$  |
| CVD, Obesity, Diabetes         | 56 (12.47)  | 30 (12.71)  | 26 (12.21)  | $\chi^2(1)=0.03$   |
| Diabetes                       | 110 (24.50) | 50 (21.19)  | 60 (28.17)  | $\chi^2(1)=2.95$   |
| Genetics                       | 58 (12.92)  | 32 (13.56)  | 26 (12.21)  | $\chi^2(1)=0.18$   |

M = mean, SD = standard deviation, N= frequency, %=percent; t = t test;  $\chi^2$  = Pearson chi-square;

t test and chi square test were conducted as appropriate; \*P < .05; \*\*P < .01; \*\*\*P < .001;

<sup>6</sup>Research Interest categories are not mutually exclusion
