# Supplementary figures and images for: A culturally tailored research ethics training curriculum for American Indian and Alaska Native communities: a randomized comparison trial
Source: PubMed Central journal article supplement — Crit Public Health. Author manuscript; Available in PMC 2019 Jan 4. (PMC6320230; doi:10.1080/09581596.2018.1434482), 2018-02-20

Figure 1. CONSORT Flow Diagram

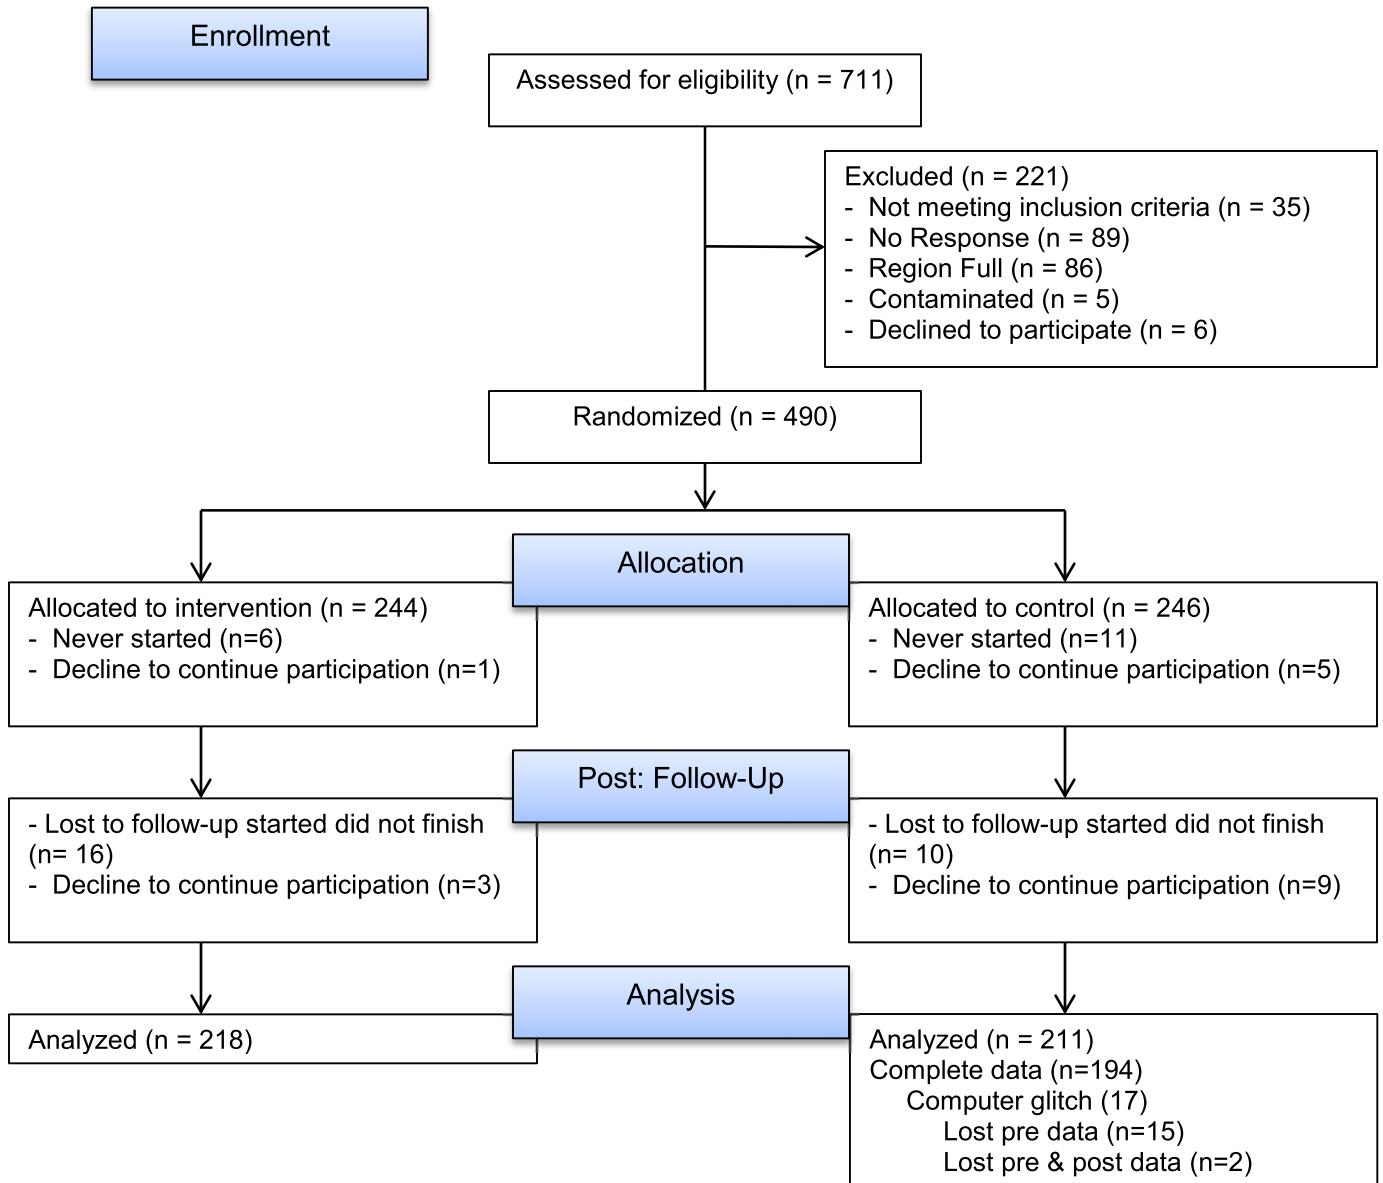

Supplement: NIHMS953414-supplement-Figure_1.pdf [file NIHMS953414-supplement-Figure_1.pdf]
